# Supplementary material
Source: publisher site journal article supplement (https://www.dovepress.com/article/300008)
Supplement: Supplementary file 1 [file get_supplementary_file.php]

**Supplementary Information**

**The STROCSS Checklist**

| The STROCSS 2019 Guideline | | |
| --- | --- | --- |
| Item no. | **Item description** | **Page** |
| TITLE | | |
| 1 | Title:   - The word cohort or cross-sectional or case-controlled is included (yes) - The area of focus is described (e.g. disease, exposure/intervention, outcome) (yes) - Key elements of study design are stated (e.g. retrospective or prospective) (yes) | 1 |
| ABSTRACT | | |
| 2a | Introduction: the following points are briefly described   - Background (yes) - Scientific Rationale for this study (yes) | 3 |
| 2b | Methods: the following areas are briefly described   - Study design (cohort, retro-/prospective, single/multi-centred) (yes) - Patient populations and/or groups, including control group, if applicable (yes) - Interventions (type, operators, recipients, timeframes) (N/A) - Outcome measures (yes) | 3 |
| 2c | Results: the following areas are briefly described   - Summary data (with statistical relevance) with qualitative descriptions, where appropriate (yes) | 3 |
| 2d | Conclusion: the following areas are briefly described   - Key conclusions (yes) - Implications to practice (yes) - Direction of and need for future research (yes) | 3 |
| INTRODUCTION | | |
| 3 | Introduction: the following areas are described in full   - Relevant background and scientific rationale (yes) - Aims and objectives (yes) - Research question and hypotheses, where appropriate (N/A) | 4-5 |
| METHODS | | |
| 4a | Registration and ethics   - Research Registry number is stated, in accordance with the declaration of Helsinki* (N/A) - All studies (including retrospective) should be registered before submission (N/A)   *"*Every research study involving human subjects must be registered in a publicly accessible database before recruitment of the first subject*" (this can be obtained from: ResearchRegistry.com or ClinicalTrials.gov or ISRCTN) |  |
| 4b | Ethical Approval: the following areas are described in full   - Necessity for ethical approval (yes) - Ethical approval, with relevant judgement reference from ethics committees (yes) - Where ethics was unnecessary, reasons are provided (yes) | 6 |
| 4c | Protocol: the following areas are described comprehensively   - Protocol (*a priori* or otherwise) details, with access directions (yes) (CHERRIES guidelines) - If published, journal mentioned with the reference provided (yes) | 6 |
| 4d | Patient Involvement in Research   - Describe how, if at all, patients were involved in study design e.g. were they involved on the study steering committee, did they provide input on outcome selection, etc. (N/A) |  |
| 5a | Study Design: the following areas are described comprehensively   - ‘Cohort’ study is mentioned (N/A) - Design (e.g. retro-/prospective, single/multi-centred) (yes) | 5 |
| 5b | Setting: the following areas are described comprehensively   - Geographical location (yes) - Nature of institution (e.g. academic/community, public/private) (yes) - Dates (recruitment, exposure, follow-up, data collection) (N/A) | 5 |
| 5c | Cohort Groups: the following areas are described in full (N/A)   - Number of groups - Division of intervention between groups |  |
| 5d | Subgroup Analysis: the following areas are described comprehensively (N/A)   - Planned subgroup analyses - Methods used to examine subgroups and their interactions |  |
| 6a | Participants: the following areas are described comprehensively   - Eligibility criteria (yes) - Recruitment sources (yes) - Length and methods of follow-up (yes) | 5-6 |
| 6b | Recruitment: the following areas are described comprehensively   - Methods of recruitment to each patient group (yes) - Period of recruitment (yes) | 6 |
| 6c | Sample Size: the following areas are described comprehensively   - Margin of error calculation (N/A) - Analysis to determine study population (N/A) - Power calculations, where appropriate (N/A) |  |
| INTERVENTION AND CONSIDERATIONS | | |
| 7a | Pre-intervention Considerations: the following areas are described comprehensively (N/A)   - Patient optimisation (pre-surgical measures) - Pre-intervention treatment (hypothermia/-volaemia/-tension; ICU care; bleeding problems; medications) |  |
| 7b | Intervention: the following areas are described comprehensively (N/A)   - Type of intervention and reasoning (e.g. pharmacological, surgical, physiotherapy, psychological) - Aim of intervention (preventative/therapeutic) - Concurrent treatments (antibiotics, analgaesia, anti-emetics, NBM, VTE prophylaxis) - Manufacturer and model details where applicable |  |
| 7c | Intra-Intervention Considerations: the following areas are described comprehensively (N/A)   - Administration of intervention (location, surgical details, anaesthetic, positioning, equipment needed, preparation, devices, sutures, operative time) - Pharmacological therapies include formulation, dosages, routes and durations - Figures and other media are used to illustrate |  |
| 7d | Operator Details: the following areas are described comprehensively (N/A)   - Training needed - Learning curve for technique - Specialisation and relevant training |  |
| 7e | Quality Control: the following areas are described comprehensively (N/A)   - Measures taken to reduce variation - Measures taken to ensure quality and consistency in intervention delivery |  |
| 7f | Post-Intervention Considerations: the following areas are described comprehensively (N/A)   - Post-operative instructions and care - Follow-up measures - Future surveillance requirements (e.g. imaging, blood tests) |  |
| 8 | Outcomes: the following areas are described comprehensively (N/A)   - Primary outcomes, including validation, where applicable - Definitions of outcomes - Secondary outcomes, where appropriate - Follow-up period for outcome assessment, divided by group |  |
| 9 | Statistics: the following areas are described comprehensively   - Statistical tests, packages/software used, and interpretation of significance (yes) - Confounders and their control, if known (N/A) - Analysis approach (e.g. intention to treat/per protocol) (N/A) - Sub-group analysis, if any(yes) | 7 |
| RESULTS | | |
| 10a | Participants: the following areas are described comprehensively   - Flow of participants (recruitment, non-participation, cross-over and withdrawal, with reasons) (no) - Population demographics (prognostic features, relevant socioeconomic features, and significant numerical differences) (yes) | 7 |
| 10b | Participant Comparison: the following areas are described comprehensively   - Table comparing demographics included(yes) - Differences, with statistical relevance (yes) - Any group matching, with methods (yes) | 7-8 |
| 10c | Intervention: the following areas are described comprehensively (N/A)   - Changes to interventions, with rationale and diagram, if appropriate - Learning required for interventions - Degree of novelty for intervention |  |
| 11a | Outcomes: the following areas are described comprehensively   - Clinician-assessed and patient-reported outcomes for each group (N/A) - Relevant photographs and imaging are desirable (N/A) - Confounders to outcomes and which are adjusted (N/A) |  |
| 11b | Tolerance: the following areas are described comprehensively (N/A)   - Assessment of tolerance - Loss to follow up, with reasons (percentage and fraction) - Cross-over with explanation |  |
| 11c | Complications: the following areas are described comprehensively (N/A)   - Adverse events described - Classified according to Clavien-Dindo classification* - Mitigation for adverse events (blood loss, wound care, revision surgery should be specified)   *Dindo D, Demartines N, Clavien P-A. Classification of Surgical Complications. A New Proposal with Evaluation in a Cohort of 6336 Patients and Results of a Survey. Ann Surg. 2004; 240(2): 205-213 |  |
| 12 | Key Results: the following areas are described comprehensively   - Key results, including relevant raw data (yes) - Statistical analyses with significance (yes) | 7-8 |
| DISCUSSION | | |
| 13 | Discussion: the following areas are described comprehensively   - Conclusions and rationale (yes) - Reference to relevant literature (yes) - Implications to clinical practice (yes) - Comparison to current gold standard of care (yes) - Relevant hypothesis generation (N/A) | 8-10 |
| 14 | Strengths and Limitations: the following areas are described comprehensively   - Strengths of the study (yes) - Limitations and potential impact on results (yes) - Assessment of bias and management (yes) | 10 |
| 15 | Implications and Relevance: the following areas are described comprehensively   - Relevance of findings and potential implications to clinical practice are detailed (yes) - Future research that is needed is described, with study designs detailed (yes) | 10 |
| CONCLUSION | | |
| 16 | Conclusions:   - Key conclusions are summarised (yes) - Key directions for future research are summarised (yes) | 10 |
| DECLARATIONS | | |
| 17a | Conflicts of interest   - Conflicts of interest, if any, are described (yes) | 10 |
| 17b | Funding   - Sources of funding (e.g. grant details), if any, are clearly stated (no) |  |

**Note:** Reprinted from *Int J Surg*. 72, Agha R, Abdall-Razak A, Crossley E, et al. STROCSS 2019 guideline: strengthening the reporting of cohort studies in surgery. 156–165, copyright (2019), with permission from Elsevier.1

**Reference:**

1. Agha R, Abdall-Razak A, Crossley E, et al. STROCSS 2019 guideline: strengthening the reporting of cohort studies in surgery. *Int J Surg*. 2019;72:156–165. doi:10.1016/j.ijsu.2019.11.002

**Supplementary Table S1. The study questionnaire**

| Age (years) | 25-30 | >30 |
| --- | --- | --- |
| Gender | Male | Female |
| Practicing hospital | Private sector | Public sector |
| Residence | Urban | Rusral |
| Specialty | General surgeon | |
| Orthopedic surgeon | |
| Neurosurgeon | |
| others | |
| Locality of the hospital | Bunnu | |
| Karak | |
| Kohat | |
| Peshawar | |
| Charsadda | |
| Mardan | |
| Swat | |
| Experience | <1 year | |
|  | 1–5 years | |
|  | >5 years | |
| Did you deal COVID-19 patients | Yes | No |
| Items | Responses | |
| Yes | No |
| **Barriers related to facility** |  |  |
| Does your facility have policies and practices in order to minimize the chance of exposure to the COVID-19 virus? |  |  |
| Does your facility have a separate surgical room for COVID-19 positive or suspected patients |  |  |
| Does your facility have policies and procedures to restrict visitors from entering to isolated surgical room? |  |  |
| Does your facility permit sick leaves upon exposure to novel coronavirus 2019 (nCoV-19) |  |  |
| Does your facility have task-specific education and training programs on preventing transmission of COVID-19 infection? |  |  |
| Did you facilitate with complete personal protective equipment |  |  |
| **Barriers related to the surgeon’s knowledge, and their support staff** |  |  |
| Do you have complete knowledge about standard protocols and procedures for dealing with COVID-19 known or suspected patients? |  |  |
| Did you consider yourself at high risk during dealing with patients in the current pandemic situation |  |  |
| Does supportive staff provide complete support while engaging with COVID-19 known or suspected patient |  |  |
| Do you have sufficient and skillful supportive staff while dealing with covid-19 suspected or known patients |  |  |
| **Barriers related to patients and their caregivers** |  |  |
| Does covid-19 suspected or known patient provide complete cooperation? |  |  |
| Overcrowding in Emergency rooms is a barrier in infectious control practice? |  |  |

**­Supplementary Table S2.** **The association of demographics with barriers related to facility by using binary logistic regression**

|  | | Does your facility have policies and practices to minimize the chance of exposure to the COVID-19 virus? | | Does your facility have a separate surgical room for COVID-19 positive or suspected patients | | | Does your facility have policies and procedures to restrict a visitor from entering an isolated surgical room? | | Does your facility permit sick leaves upon exposure to novel coronavirus 2019 (nCoV-19) | | Does your facility have task-specific education and training programs on preventing transmission of COVID-19 infection? | | | Do you facilitate with complete personal protective equipment | |
| --- | --- | --- | --- | --- | --- | --- | --- | --- | --- | --- | --- | --- | --- | --- | --- |
|  | | OR (95%CI) | p-value | OR (95%CI) | p-value | | OR (95%CI) | p-value | OR (95%CI) | p-value | OR (95%CI) | p-value | | OR (95%CI) | p-value |
| Age | 25-30 | 2.6(1.5-4.4) | <0.001 | 3.1(2.7-5.2) | <0.001 | | 1.5(0.8-2.7 | 0.14 | 0.65(0.3-1.1) | 0.13 | 1.7(1.0-2.8) | 0.02 | | 0.3(0.2-0.5) | 0.3 |
| >30 | Reference | | | | | | | | | | | | | |
| Gender | Male | 2.6(1.4-4.5) | 0.001 | 2.8(1.3-4.7) | <0.001 | | 1.6(0.9-3.0) | 0.09 | 1.7(0.9-3.3) | 0.06 | 3.7(2.2-6.2) | <0.001 | | 0.7(0.48-1.29) | 0.79 |
| Female | Reference | | | | | | | | | | | | | |
| Hospital | Private | 1.9(1.01-3.8) | <0.001 | 1.4(0.7-2.8) | 0.27 | | 2.6(1.4-4.8) | 0.002 | 0.6(0.3-1.1) | 0.11 | 1.6(1.0-2.7) | 0.02 | | 3.5(2.0-5.9) | <0.001 |
| Government | Reference | | | | | | | | | | | | | |
| Residence | urban | 0.1(0.06-0.2) | <0.001 | 2.7(1.3-5.5) | 0.007 | | 1.3(0.7-2.4) | 0.25 | 0.3(0.2-0.7) | 0.002 | 2.4(1.5-3.9) | <0.001 | | 0.7(0.4-1.2) | 0.27 |
| rural | Reference | | | | | | | | | | | | | |
| deals COVID-19 patients | yes | 0.3(0.2-0.7) | 0.002 | 1.9(0.8-4.3) | | 0.11 | 2.2(1.2-3.8) | 0.006 | 1.9(1.0-3.4) | 0.02 | 0.8(0.5-1.4) | | 0.54 | 0.4(0.2-0.7) | 0.002 |
| no | Reference | | | | | | | | | | | | | |
| Specialty | General surgeon | 0.5(0.3-1.02) | 0.06 | 0.5(0.2-1.2) | | 0.15 | 0.5(0.3-1.06) | 0.08 | 0.2(0.1-0.5) | <0.001 | 0.3(0.2-0.6) | | <0.001 | 0.4(0.2-0.7) | 0.003 |
|  | Orthopedic surgeon | 0.7(0.3-1.5) | 0.40 | 0.8(0.2-2.7) | | 0.78 | 0.6(0.2-1.3) | 0.24 | 2.6(1.2-5.4) | 0.01 | 0.3(0.1-0.7) | | 0.007 | 0.6(0.3-1.3) | 0.25 |
|  | Neuro surgeon | 0.2(0.09-0.9) | 0.03 | 0.8(0.2-2.7) | | 0.72 | 0.4(0.1-1.3) | 0.15 | 1.1(0.4-3.02) | 0.81 | 0.1(0.05-0.3) | | <0.001 | 0.5(0.2-1.3) | 0.19 |
|  | others | Reference | | | | | | | | | | | | | |
| Experience | <1 year | 1.3(0.6-2.4) | 0.41 | 0.1(0.06-0.3) | | <0.001 | 0.1(0.06-0.4) | <0.001 | 0.2(0.1-0.4) | <0.001 | O.1(0.09-0.3) | | <0.001 | 2.6(1.3-5.07) | 0.004 |
|  | 1-5 years | 1.02(0.5-1.8) | 0.92 | 0.7(0.2-1.8) | | 0.48 | 0.9(0.5-1.7) | 0.97 | 0.1(0.05-0.2) | <0.001 | 1.7(0.9-3.1) | | 0.05 | 2.9(1.6-5.4) | <0.001 |
|  | >5 years | Reference | | | | | | | | | | | | | |
| Hospital locality | Bunnu | 0.03(0.007-0.21) | <0.001 | 1.7(0.2-13.6) | | 0.59 | 0.1(0.01-1.8) | 0.14 | 1.5(0.3-6.8) | 0.58 | 0.6(0.1-2.6) | | 0.49 | 0.2(0.06-1.3) | 0.12 |
|  | Karak | 0.06(0.01-0.3) | 0.002 | 1.0(0.1-7.9) | | 0.91 | 2.5(0.5-12.1) | 0.25 | 0.6(0.09-4.2) | 0.63 | 0.6(0.1-2.2) | | 0.49 | 0.1(0.01-1.4) | 0.10 |
|  | Kohat | 0.01(0.002-0.17) | <0.001 | 3.2(0.2-38.8) | | 0.35 | 8.5(1.9-36.7) | 0.004 | 0.4(0.06-2.6) | 0.34 | 0.7(0.2-2.5) | | 0.61 | 7.4(1.9-28.4 | 0.003 |
|  | Peshawar | 0.2(0.1-0.7) | 0.01 | 0.4(0.1-2.2) | | 0.36 | 1.6(0.4-6.04) | 0.43 | 1.4(0.3-5.1) | 0.60 | 0.5(0.1-1.4) | | 0.21 | 1.9(0.6-5.8) | 0.20 |
|  | Charsadda | 0.5(0.1-1.7) | 0.28 | 1.3 (0.1-10.8) | | 0.76 | 0.4(0.06-3.05) | 0.41 | 7.0(1.5-30.8) | 0.01 | 0.5(0.1-1.7) | | 0.28 | 7.8(1.9-31.1) | 0.004 |
|  | Mardan | 0.08(0.008-0.8 | 0.03 | 0.7(0.05-9.8) | | 0.87 | 0.8(0.07-9.6) | 0.88 | 0.8(0.07-9.6) | 0.88 | 0.08(0.008-0.8) | | 0.03 | 0.4(0.04-4.5) | 0.48 |
|  | Swat | Reference | | | | | | | | | | | | | |

**Supplementary Table S3: The association of demographics with barriers related to surgeon’s knowledge and their support staff by using binary logistic regression**

|  | | Do you have complete knowledge about standard protocols and procedures for dealing with COVID-19 known or suspected patients? | | Did you consider yourself at high risk during dealing with patients in the current pandemic situation | | | Does supportive staff provide complete support while engaging with COVID-19 known or suspected patient | | Do you have sufficient and skillful supportive staff while dealing with covid-19 suspected or known patients | |
| --- | --- | --- | --- | --- | --- | --- | --- | --- | --- | --- |
|  | | OR (95%CI) | p-value | OR (95%CI) | p-value | | OR (95%CI) | p-value | OR (95%CI) | p-value |
| Age | 20-30 | 0.1(0.1-0.3) | <0.001 | 0.2(0.1-0.4) | <0.001 | | 0.2(0.1-0.3) | <0.001 | 1.3(0.8-2.1) | 0.27 |
| >30 | Reference | | | | | | | | |
| Gender | Male | 4.3(2.2-8.4) | <0.001 | 0.6(0.2-0.9) | 0.62 | | 0.1(0.09-0.2) | <0.001 | 0.3(0.2-0.5) | <0.001 |
| Female | Reference | | | | | | | | |
| Hospital | Private | 0.9(0.5-1.5) | 0.74 | 2.2(1.1-4.4) | 0.014 | | 2.0(1.2-3.4) | 0.004 | 0.5(0.3-0.8) | 0.007 |
| Government | Reference | | | | | | | | |
| Residence | Urban | 3.5(2.0-6.2) | <0.001 | 3.6(1.7-7.6) | <0.001 | | 1.1(0.6-1.8) | 0.64 | 1.2(0.7-2.0) | 0.33 |
| Rural | Reference | | | | | | | | |
| deals COVID-19 patients | Yes | 4.3(2.1-8.85) | <0.001 | 1.6(0.7-3.4) | | 0.21 | 0.5(0.3-0.9) | 0.02 | 0.4(0.2-0.6) | 0.001 |
| No | Reference | | | | | | | | |
| Specialty | General surgeon | 0.07(0.2-0.1) | <0.001 | 0.1(0.07-0.5) | | 0.002 | 1.4(0.8-2.5) | 0.19 | 4.8(2.5-9.1) | <0.001 |
|  | Orthopedic surgeon | 4.9(2.1-11.01) | <0.001 | 5.2(2.4-11.4) | | <0.001 | 1.5(0.7-3.1) | 0.27 | 3.5(1.5-7.8) | 0.002 |
|  | Neurosurgeon | 0.4(0.1-1.2) | 0.13 | 1.5(0.5-4.4) | | 0.42 | 2.4(1.0-6.1) | 0.05 | 7.4(2.8-19.6) | <0.001 |
|  | Others | Reference | | | | | | | | |
| Experience | <1 year | 0.5(0.2-1.03) | 0.06 | 0.7(0.3-1.5) | | 0.39 | 0.7(0.3-1.2) | 0.25 | 1.5(0.8-2.8) | 0.19 |
|  | 1-5 years | 0.7(0.4-1.4) | 0.42 | 0.6(0.3-1.3) | | 0.24 | 0.05(0.02-0.1) | <0.001 | 0.9(0.5-1.6) | 0.84 |
|  | >5 years | Reference | | | | | | | | |
| Hospital locality | Bunnu | 0.06(0.007-0.6) | 0.01 | 0.2(0.02-3.2) | | 0.38 | 1.5(0.4-5.1) | 0.49 | 0.7(0.2-2.5) | 0.62 |
|  | Karak | 0.2(0.04-1.4) | 0.12 | 0.4(0.03-5.7) | | 0.55 | 0.2(0.04-1.4) | 0.12 | 0.1(0.01-1.1) | 0.06 |
|  | Kohat | 0.07(0.008-0.1) | 0.02 | 0.3(0.02-3.6) | | 0.35 | 0.1(0.02-0.9) | 0.03 | 2.5(0.7-8.6) | 0.14 |
|  | Peshawar | 1.1(0.4-3.2) | 0.76 | 2.1(0.4-9.9) | | 0.31 | 1.6(0.5-4.5) | 0.36 | 1.2(0.4-3.4) | 0.69 |
|  | Charsadda | 3.3(0.9-12.01) | 0.06 | 2.4(1.2-4.3) | | <0.001 | 0.1(0.03-1.04) | 0.05 | 1.0(0.2-3.6) | 0.99 |
|  | Mardan | 0.3(0.03-3.4) | 0.35 | 1.3(0.1-2.6) | | 0.82 | 2.5(1.1-4.7) | 0.09 | 2.6(0.4-15.9) | 0.28 |
|  | Swat | Reference | | | | | | | | |

**Supplementary Table S4. The association of demographics with barriers related to patients by using binary logistic regression**

|  | | Does covid-19 suspected or known patients provide complete cooperation? | | Overcrowding by patients or their relatives in Emergency rooms is a barrier in infectious control practice? | | |
| --- | --- | --- | --- | --- | --- | --- |
|  | | OR (95%CI) | p-value | OR (95%CI) | p-value | |
| Age | 20-30 | 1.03(0.6-1.7) | 0.89 | 2.5(0.9-6.4) | 0.05 | |
| >30 | Reference | | | | |
| Gender | Male | 0.2(0.1-0.4) | <0.001 | 0.4(0.1-1.0) | 0.06 | |
| Female | Reference | | | | |
| Hospital | Private | 0.4(0.2-0.7) | 0.003 | 2.2(1.1-4.4) | 0.014 | |
| Government | Reference | | | | |
| Residence | Urban | 0.9(0.5-1.6) | 0.9 | 0.4(0.2-0.7) | 0.32 | |
| rural | Reference |  | Reference |  | |
| deals COVID-19 patients | Yes | 1.3(0.-2.2) | 0.35 | 1.5(0.6-1.1) | | 0.33 |
| no | Reference | | | | |
| Specialty | General surgeon | 4.5(2.3-8.9) | <0.001 | 3.1(1.1-8.06) | | 0.02 |
|  | Orthopedic surgeon | 0.9(0.4-1.9) | 0.90 | 4.5(1.5-13.3) | | 0.006 |
|  | Neurosurgeon | 0.6(0.2-1.5) | 0.63 | 3.1(0.8-12.2) | | 0.09 |
|  | others | Reference | | | | |
| Experience | <1 year | 0.9(0.4-1.8) | 0.88 | 0.6(0.2-1.7) | | 0.36 |
|  | 1-5 years | 0.8(0.4-1.5) | 0.62 | 1.4(0.6-3.1) | | 0.36 |
|  | >5 years | Reference | | | | |
| Hospital locality | Bunnu | 0.5(0.1-1.6) | 0.26 | 0.3(0.05-2.3) | | 0.28 |
|  | Karak | 1.3(0.3-5.3) | 0.71 | 1.0(0.1-5.7) | | 0.99 |
|  | Kohat | 2.1(1.0-5.3) | 0.03 | 1.1(0.2-5.4) | | 0.87 |
|  | Peshawar | 1.7(0.6-4.9) | 0.29 | 0.7(0.2-2.8) | | 0.67 |
|  | Charsadda | 0.5(0.1-1.7) | 0.28 | 1.0(0.1-5.1) | | 0.99 |
|  | Mardan | 0.08(0.008-0.8) | 0.03 | 0.8(0.07-9.6) | | 0.88 |
|  | Swat | Reference | | | | |

**Supplementary Table S5. The association of gender with the barriers**

| Demographics variables |  | Male | Female | P-value |
| --- | --- | --- | --- | --- |
| N (%) | N (%) |
| Does your facility have policies and practices in order to minimize the chance of exposure to the COVID-19 virus? | yes | 115 (61.85) | 82 (77.4%) | 0.006 |
| no | 71 (38.2%) | 24 (22.6%) |
| Does your facility have separate surgical room for COVID-19 positive or suspected patients | yes | 12 (6.5%) | 39 (36.8%) | 0.001 |
| no | 174 (93.5%) | 67 (63.2%) |
| Does your facility have policies and procedures to restrict visitors from entering to isolated surgical room? | yes | 134 (72.0%) | 86 (81.1%) | 0.083 |
| no | 52 (28.0%) | 20 (18.9%) |
| Does your facility permit sick leaves upon exposed to novel coronavirus 2019 (nCoV-19) | yes | 137 (73.7%) | 89 (84.0%) | 0.043 |
| no | 49 (26.3%) | 17 (16.0%) |
| Does your facility have task-specific education and training programs on preventing transmission of infectious agents prior to caring for a patient? | yes | 67 (36.0%) | 71 (67.0%) | 0.001 |
| no | 119 (64.0%) | 35 (33.0%) |
| Did you facilitate with complete personal protective equipment | yes | 112 (60.2%) | 59 (55.7%) | 0.447 |
| no | 74 (39.8%) | 47 (44.3%) |
| Do you have complete knowledge about standard protocols and procedures for dealing with COVID-19 known or suspected patients? | yes | 114 (61.3%) | 90 (84.9%) | 0.001 |
| no | 72 (38.7%) | 16 (15.1%) |
| Did you considered yourself at high risk during dealing with patients in the current pandemic situation | yes | 132 (71.0%) | 100 (94.3%) | 0.001 |
| no | 54 (29.0%) | 6 (5.7%) |
| Does supportive staff provide complete support while engaging with COVID-19 known or suspected patient | yes | 145 (78.0%) | 42 (39.6%) | 0.001 |
| no | 41 (22.0%) | 64 (60.4%) |
| Does you have sufficient and skillful supportive staff while dealing with covid-19 suspected or known patients | yes | 131 (70.4%) | 55 (51.9%) | 0.002 |
| no | 55 (29.6%) | 51 (48.1%) |
| Does covid-19 suspected or known patient provide complete cooperation? | yes | 70 (37.6%) | 12 (12.0%) | 0.001 |
| no | 116 (62.4%) | 88 (88.0%) |
| Overcrowding by patients or its relative in Emergency rooms is a barrier in infectious control practice? | yes | 151 (81.2%) | 100 (95.3%) | 0.001 |
| no | 35 (18.8%) | 6 (4.7%) |
